# Supplementary material
Source: PubMed Central journal article supplement (PMC4071381)
Supplement: JCI68901sd.pdf [file JCI68901sd.pdf]

### **Supplemental figure 1. Dys-regulated signal pathways in MSCs from TNF-Tg**

**mice.** 965 dys-regulated genes were uploaded to IPA and David bioinformatics Resources software. The top 53 and top 11 dys-regulated pathways were identified by IPA (A) and David bioinformatics Resources (B) analysis according to P value. The ratio is the number of genes found in our data set divided by the referenced genes in pathways of software data base.

### **Supplemental figure 2. Expression of Notch genes in MSCs of TNF-Tg mice via**

**RNAseq.** mRNA levels of Notch-related factors in CD45-/Sca1+/CD105+ MSCs from TNF-Tg mice and WT littermates by RNA-sequencing. Values are means  $\pm$  SD of 3 mice.

### **Supplemental figure 3. Characterization of 3rd passage of bone-derived MSCs.**

Bone-derived cells from WT mice were cultured in basal medium and passaged 3 times. (A) The expression profile of MSC surface markers was examined by FACS. MSC surface markers are CD45-/Sca1+/CD105+/CD44+/CD31-/CD11b-/CD117-. (B) The differentiation potential to osteoblasts, adipocytes and chondrocytes were examined by culturing cells in the appropriate inducing media for 2-4 weeks.

### **Supplemental figure 4. The effect of long-term DAPT treatment on expression**

**levels of Notch target genes.** TNF-Tg mice were treated with DAPT or vehicle by daily gavage for 3 months. Total RNA was extracted from popliteal lymph nodes and spleens, and expression levels of Notch-related genes were examined by qPCR. Values are means and SD of 3 samples. \* $p < 0.05$  vs vehicle-treated mice.

### **Supplemental figure 5. Characterization of CFU colony cells.**

BM cells from WT mice were used. Red blood cells were lysed first to obtain BM mononuclear cells. Cells were cultured in basal condition for 3 weeks. Low cell density ( $10E4/10$  cm dish)

was used in CFU colony assay to generate colony cells (A). High cell density (10E6/ml) was used to generate BM stromal cells (B). Media were changed every 5 days. Primary BM mononuclear cells were isolated freshly from a separate WT mouse (C). Cells were stained with anti-CD45, Scal1 and CD105 antibodies and subjected to FACS analyses.

**Supplemental figure 6. In vivo bone repair model.** Mice received bone scaffold alone (A) or bone scaffold plus WT CFU cells (B) were sacrificed 6 weeks post surgery. H&E-stained sections show the bone defect area (black dash line) and newly formed bone (solid black line). The defects that were filled with bone scaffold alone have significantly lesser bone volume compared to those that were filled with bone scaffold plus CFU cells (C). N= 5 mice/group. \*p<0.05 vs no cell group.

**Supplemental figure 7. The effect of long-term DAPT treatment on morphology of internal organs.** WT mice were treated with DAPT or vehicle by daily gavage for 3 months. Internal organs were stained with H&E. Representative sections were shown.

**Supplemental figure 8. Thapsigargin reduces Hes1 expression and revises decreased osteoblast differentiation of MSCs in TNF-Tg mice.** TNF-Tg mice and WT littermates were i.p. injected with the new Notch inhibitor Thapsigargin (0.4mg/kg/time) or vehicle daily for 4 days. (A) The inhibitory effect of Thapsigargin on Notch activation (*Hes1* mRNA) was confirmed in the popliteal lymph nodes (positive Ctl) and in CD45- MSC-enriched cells by qPCR. (B) Representative photos and # of CFU-ALP+ colonies in BM stromal cells from Thapsigargin- or vehicle-treated mice. TNF-Tg mice and WT littermates were i.p. injected with Thapsigargin (0.4mg/kg/time, 3 time/week) or vehicle for 2 months. (C) The expression levels of Hey1 in CFU cells from Thapsigargin- or PBS-treated mice were examined by qPCR. \*p<0.05 vs vehicle-treated mice, #p<0.05 vs WT mice.

**Supplemental figure 9. Activation status of Notch signaling in cells at different**

**confluence.** Expression levels of Hes1 and NICD (Notch-2) in C3H10T1/2 cells at different confluence levels were examined by Western blotting using anti-NICD (Notch-2) antibody.

**Supplemental figure 10. Correlation of gene expression levels in CD45- MSCs from BM and peripheral blood mononuclear cells.** CD45- cells were isolated from BM mononuclear cells (BMMCs) and peripheral blood mononuclear cells (PBMCs) of TNF-Tg mice and WT littermates. The expression levels of Hes1 and Runx2 from BMMCs and paired PBMCs were determined by qPCR. Values were calculated based the equation=  $\frac{1}{2} CT(\text{gene of interest}) - CT(\text{actin})$ .

## Supplemental figure 1A

|                                                                           | p-value         |
|---------------------------------------------------------------------------|-----------------|
| Ingenuity Canonical Pathways                                              |                 |
| HGF Signaling                                                             | 0.000676        |
| Acute Myeloid Leukemia Signaling                                          | 0.001           |
| SAPK/JNK Signaling                                                        | 0.001148        |
| B Cell Receptor Signaling                                                 | 0.00263         |
| Role of Osteoblasts, Osteoclasts and Chondrocytes in Rheumatoid Arthritis | 0.00302         |
| Xenobiotic Metabolism Signaling                                           | 0.00309         |
| Molecular Mechanisms of Cancer                                            | 0.003236        |
| PI3K/AKT Signaling                                                        | 0.003548        |
| p53 Signaling                                                             | 0.004365        |
| LPS/IL-1 Mediated Inhibition of RXR Function                              | 0.005248        |
| Assembly of RNA Polymerase I Complex                                      | 0.006457        |
| Phospholipid Degradation                                                  | 0.006761        |
| Insulin Receptor Signaling                                                | 0.006918        |
| <b>Notch Signaling</b>                                                    | <b>0.007079</b> |
| Type II Diabetes Mellitus Signaling                                       | 0.007762        |
| Huntington's Disease Signaling                                            | 0.007762        |
| Glioblastoma Multiforme Signaling                                         | 0.007943        |
| IL-15 Production                                                          | 0.008128        |
| CD27 Signaling in Lymphocytes                                             | 0.008128        |
| Pentose and Glucuronate Interconversions                                  | 0.008128        |
| NF- $\kappa$ B signaling                                                  | 0.008511        |
| JAK/Stat Signaling                                                        | 0.009333        |
| Histidine Metabolism                                                      | 0.01            |
| Pancreatic Adenocarcinoma Signaling                                       | 0.010471        |
| PPAR $\alpha$ /RXR $\alpha$ Activation                                    | 0.01122         |
| Production of Nitric Oxide and Reactive Oxygen Species in Macrophages     | 0.012303        |

## Continued Supplemental figure 1A

| Ingenuity Canonical Pathways                   | p-value  |
|------------------------------------------------|----------|
| Acute Phase Response Signaling                 | 0.012589 |
| Lymphotoxin $\beta$ Receptor Signaling         | 0.014791 |
| PDGF Signaling                                 | 0.015488 |
| FGF Signaling                                  | 0.016596 |
| Atherosclerosis Signaling                      | 0.016982 |
| MSP-RON Signaling Pathway                      | 0.017783 |
| Factors Promoting Cardiogenesis in Vertebrates | 0.017783 |
| Glycerophospholipid Metabolism                 | 0.017783 |
| IL-9 Signaling                                 | 0.018197 |
| Glycolysis/Gluconeogenesis                     | 0.019498 |
| Human Embryonic Stem Cell Pluripotency         | 0.020893 |
| Androgen and Estrogen Metabolism               | 0.021878 |
| Leptin Signaling in Obesity                    | 0.022387 |
| Assembly of RNA Polymerase II Complex          | 0.025704 |
| Colorectal Cancer Metastasis Signaling         | 0.026915 |
| Type I Diabetes Mellitus Signaling             | 0.027542 |
| GM-CSF Signaling                               | 0.028184 |
| Estrogen Receptor Signaling                    | 0.032359 |
| Chronic Myeloid Leukemia Signaling             | 0.033113 |
| Glioma Signaling                               | 0.037154 |
| PKC $\theta$ Signaling in T Lymphocytes        | 0.038019 |
| Prostate Cancer Signaling                      | 0.038019 |
| Tyrosine Metabolism                            | 0.038019 |
| Docosahexaenoic Acid (DHA) Signaling           | 0.038019 |
| Thrombopoietin Signaling                       | 0.038905 |
| PXR/RXR Activation                             | 0.042658 |
| Glucocorticoid Receptor Signaling              | 0.044668 |

## Supplemental figure 1B

| Sublist                  | Category     | Term                                                     | P-Value |
|--------------------------|--------------|----------------------------------------------------------|---------|
| <input type="checkbox"/> | KEGG_PATHWAY | <a href="#">p53 signaling pathway</a>                    | 3.8E-3  |
| <input type="checkbox"/> | KEGG_PATHWAY | <a href="#">Hematopoietic cell lineage</a>               | 1.3E-2  |
| <input type="checkbox"/> | KEGG_PATHWAY | <a href="#">Pentose and glucuronate interconversions</a> | 3.9E-2  |
| <input type="checkbox"/> | KEGG_PATHWAY | <a href="#">Prostate cancer</a>                          | 5.1E-2  |
| <input type="checkbox"/> | KEGG_PATHWAY | <a href="#">MAPK signaling pathway</a>                   | 5.5E-2  |
| <input type="checkbox"/> | KEGG_PATHWAY | <a href="#">Chemokine signaling pathway</a>              | 7.0E-2  |
| <input type="checkbox"/> | KEGG_PATHWAY | <a href="#">Ether lipid metabolism</a>                   | 7.3E-2  |
| <input type="checkbox"/> | KEGG_PATHWAY | <a href="#">Notch signaling pathway</a>                  | 7.5E-2  |
| <input type="checkbox"/> | KEGG_PATHWAY | <a href="#">Primary immunodeficiency</a>                 | 7.9E-2  |
| <input type="checkbox"/> | KEGG_PATHWAY | <a href="#">Adipocytokine signaling pathway</a>          | 8.3E-2  |
| <input type="checkbox"/> | KEGG_PATHWAY | <a href="#">Cytokine-cytokine receptor interaction</a>   | 8.8E-2  |

## Supplemental figure 1. Dys-regulated signal pathways in MSCs from TNF-Tg mice

## Supplemental figure 2

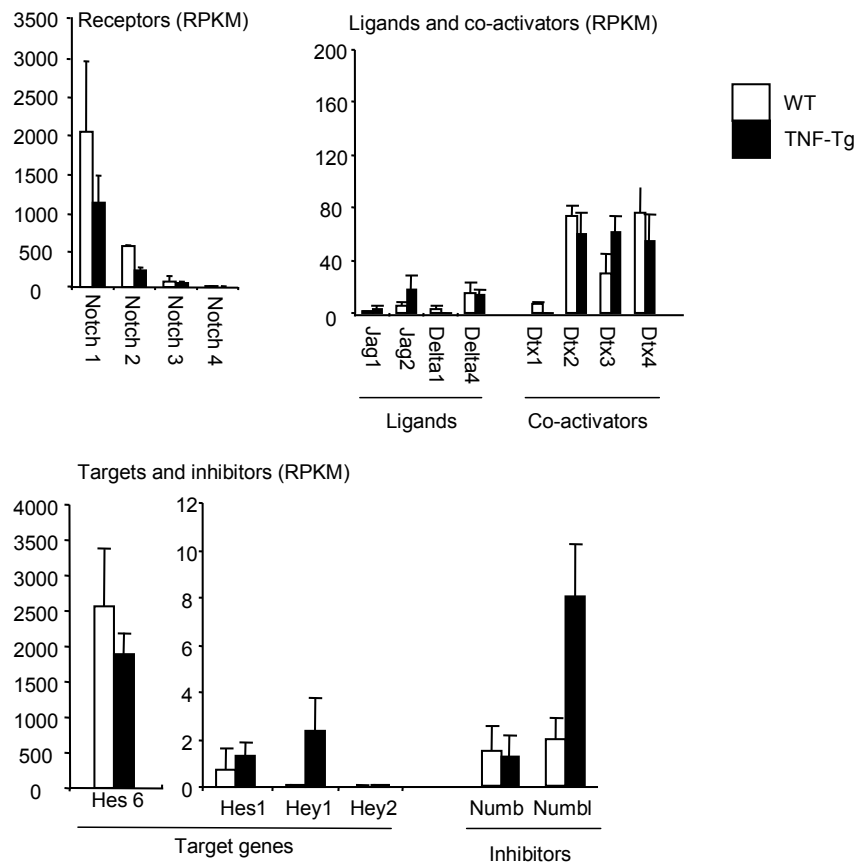

**Supplemental figure 2. Expression of Notch genes in MSCs of TNF-Tg mice via RNAseq.**

### Supplemental figure 3

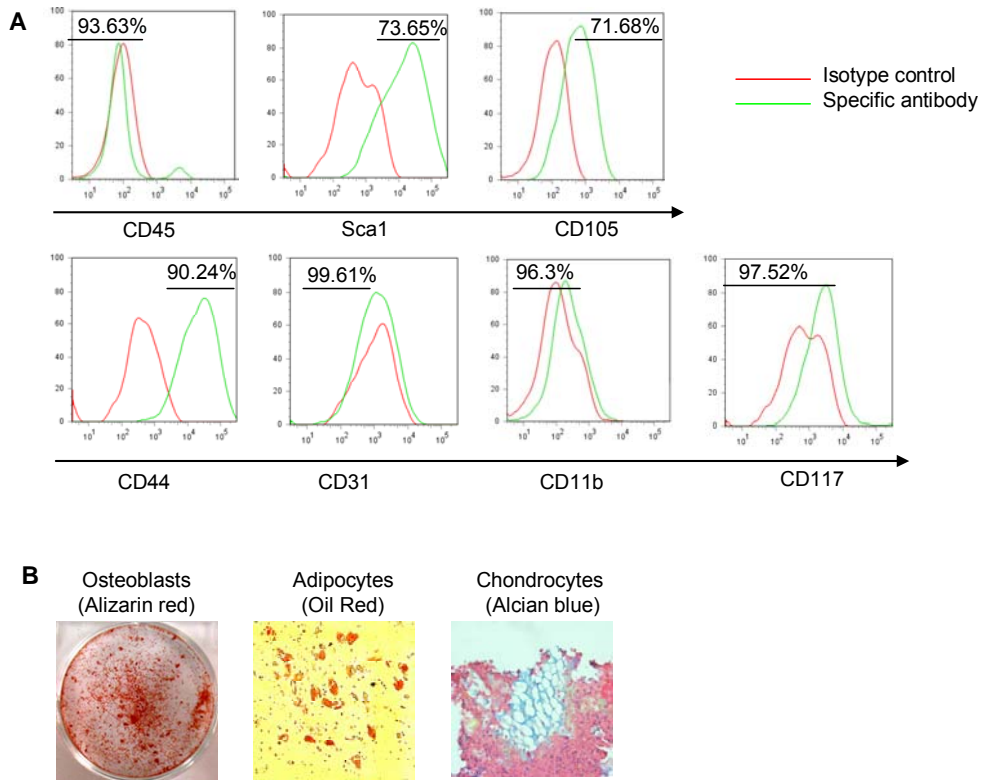

**Supplemental figure 3. Characterization of 3rd passage of bone-derived MSCs.**



## Supplemental figure 4

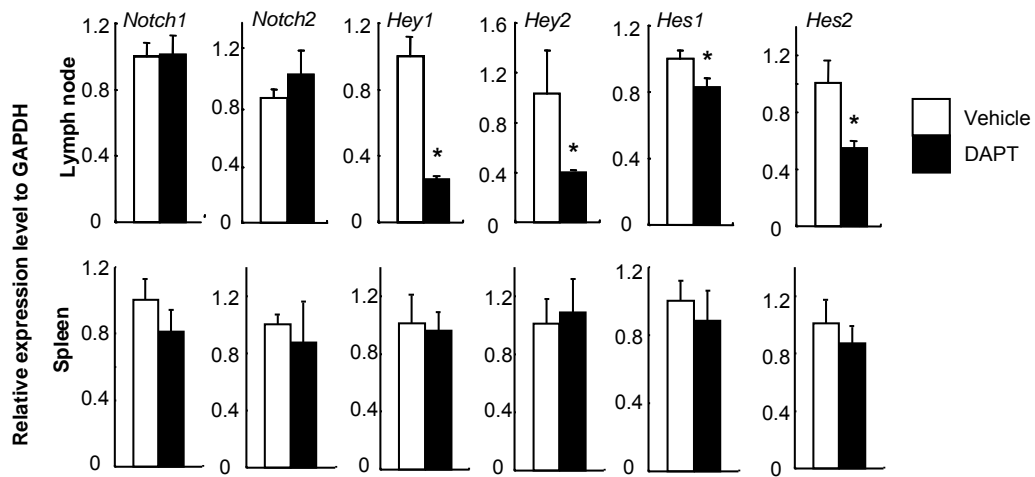

**Supplemental figure 4. The effect of long-term DAPT treatment on expression levels of Notch target genes.**

Supplemental figure 5

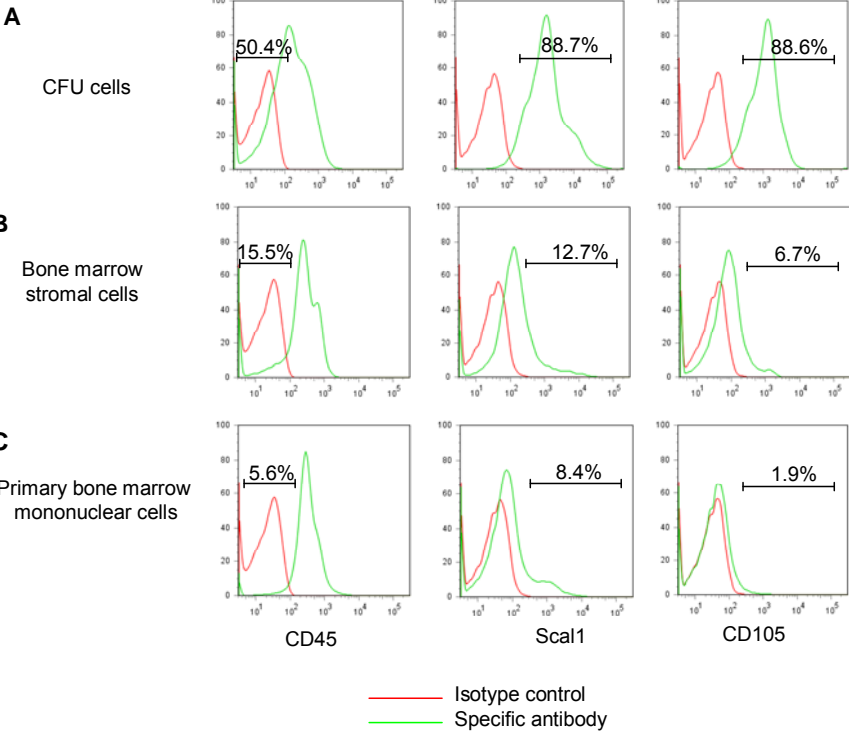

Supplemental figure 5. Characterization of CFU colony cells.

## Supplemental figure 6

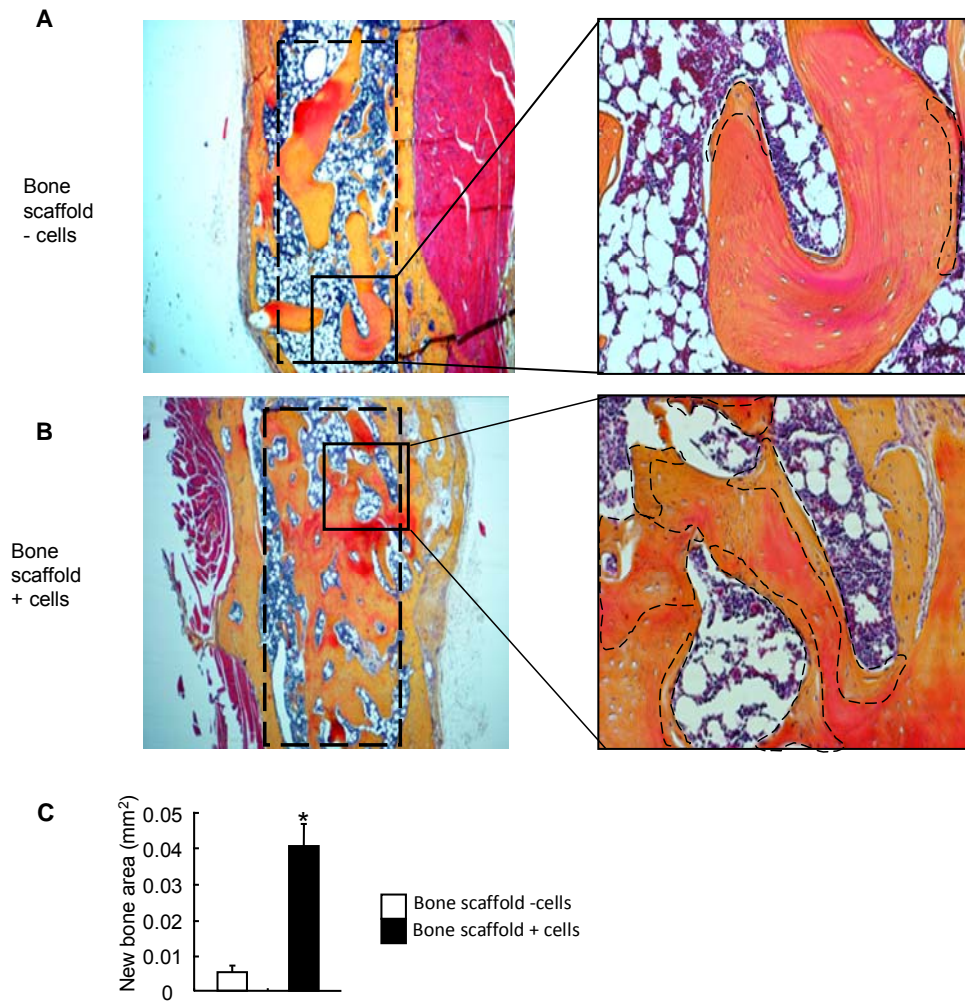

Supplemental figure 6. In vivo bone repair model.

## Supplemental figure 7

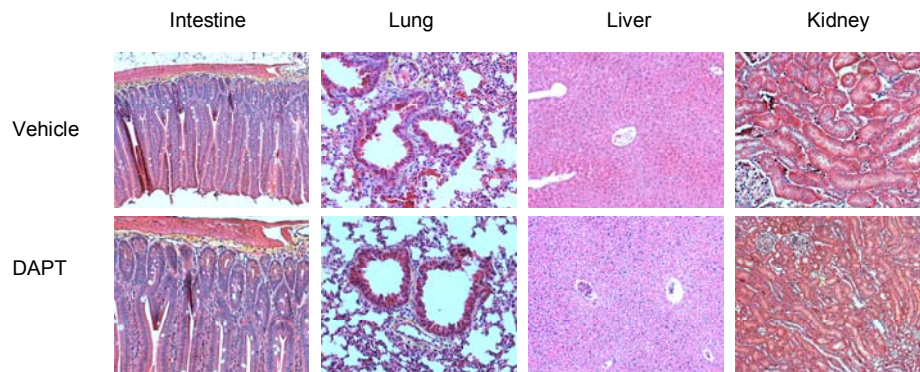

**Supplemental figure 7. The effect of long-term DAPT treatment on morphology of internal organs.**

## Supplemental figure 8

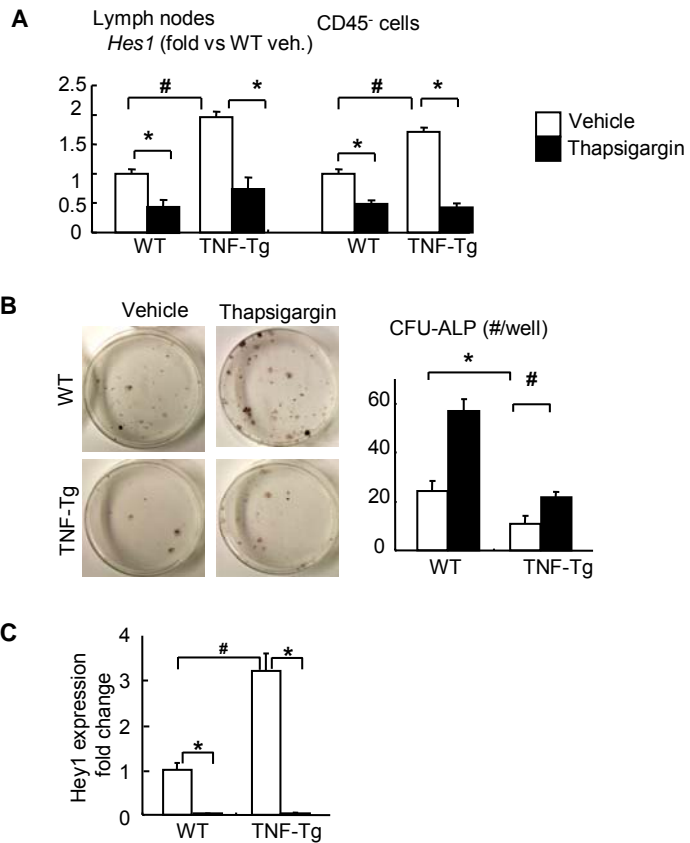

**Supplemental figure 8. Thapsigargin reduces Hes1 expression and revises decreased osteoblast differentiation of MSCs in TNF-Tg mice.**

## Supplemental figure 9

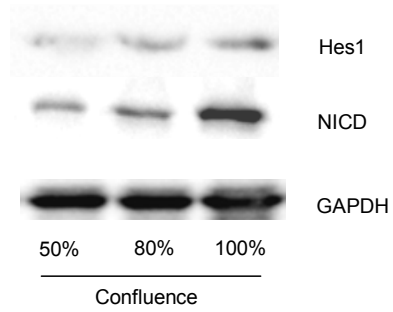

**Supplemental figure 9. Activation status of Notch signaling in cells at different confluence.**

## Supplemental figure 10

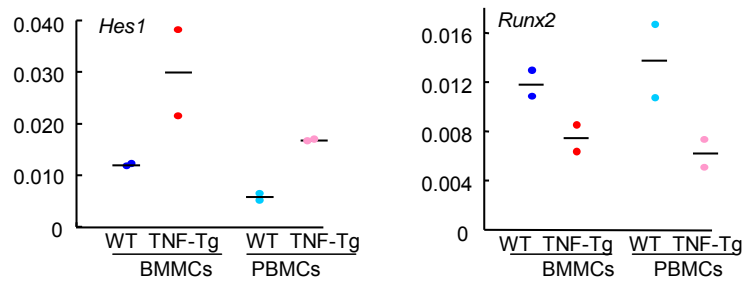

**Supplemental figure 10. Correlation of gene expression levels in CD45-  
MSCs from BM and peripheral blood mononuclear cells.**

## Supplemental table

### A. Murine primer sequences

| Name    | F / R | Sequences               |
|---------|-------|-------------------------|
| mHes1   | F     | GACCCAGATCAACGCCATGA    |
|         | R     | TGGAAGCCGCCAAAAACCTT    |
| mHes2   | F     | CTGAAGGGTCTCGTATTGCCG   |
|         | R     | CGCAGGTGCTCTAGTAGGC     |
| mHey1   | F     | GCGCGGACGAGAATGGAAA     |
|         | R     | TCAGGTGATCCACAGTCATCTG  |
| mHey2   | F     | AAGCGCCCTTGTGAGGAAAC    |
|         | R     | GGTAGTTGTCGGTGAATTGGAC  |
| mNotch1 | F     | CCCTTGCTCTGCCTAACGC     |
|         | R     | GGAGTCCTGGCATCGTTGG     |
| mNotch2 | F     | ATGTGGACGAGTGTCTGTTGC   |
|         | R     | GGAAGCATAGGCACAGTCATC   |
| mALP    | F     | CTTGCTGGTGGAAAGGAGGCAGG |
|         | R     | CACGTCTTCTCCACCGTGGGTC  |
| mRunx2  | F     | CAAGAAGGCTCTGGCGTTTA    |
|         | R     | TGCAGCCTTAAATGACTCGG    |
| mGAPDH  | F     | GGTCGGTGTGAACGGATTTG    |
|         | R     | ATGAGCCCTTCCACAATG      |



**B. Human primer sequences**

| Name   | F / R | Sequences              |
|--------|-------|------------------------|
| hHes1  | F     | TGAGCCAGCTGAAAACACTG   |
|        | R     | GTGCGCACCTCGGTATTAAC   |
| hHey1  | F     | GTTCCGGCTCTAGGTTCCATGT |
|        | R     | CGTCGGCGCTTCTCAATTATTC |
| hp52   | F     | ATGGAGAGTTGCTACAACCCA  |
|        | R     | CTGTTCCACGATCACCAGGTA  |
| hRelB  | F     | CCATTGAGCGGAAGATTCAACT |
|        | R     | CTGCTGGTCCCGATATGAGG   |
| hALP   | F     | ACCACCACGAGAGTGAACCA   |
|        | R     | CGTTGTCTGAGTACCAGTCCC  |
| hRunx2 | F     | TCAACGATCTGAGATTTGTGGG |
|        | R     | GGTCAAGGTGAAACTCTTGCC  |
| hGAPDH | F     | AAGGTGAAGTCCGAGTCAAC   |
|        | R     | GGGGTCATTGATGGCAACAATA |
